# Supplementary material for: Genetic Analysis in Fetal Skeletal Dysplasias by Trio Whole-Exome Sequencing
Source: Biomed Res Int. 2019 May 14;2019:2492590. doi: 10.1155/2019/2492590 (PMC6537022; doi:10.1155/2019/2492590)
Supplement: Supplementary Materials — The supplementary materials, in two parts, are provided along with the manuscript in the form of a ZIP file, which included detailed clinical data and additional molecular data. The contents of the supplementary materials are referenced at appropriate points within the manuscript. [file 2492590.f1.zip]

Archive with 3 entries (2 files):
- 2492590.f1/
- 2492590.f1/Supplementary Material 1-clinical data.docx
- 2492590.f1/Supplementary Material 2-molecular data.doc
